# Supplementary material for: Ultradian rhythms in heart rate variability and distal body temperature anticipate onset of the luteinizing hormone surge
Source: PubMed Central journal article supplement (PMC7683606; doi:10.1038/s41598-020-76236-6), 2020-11-23

Supp. 1

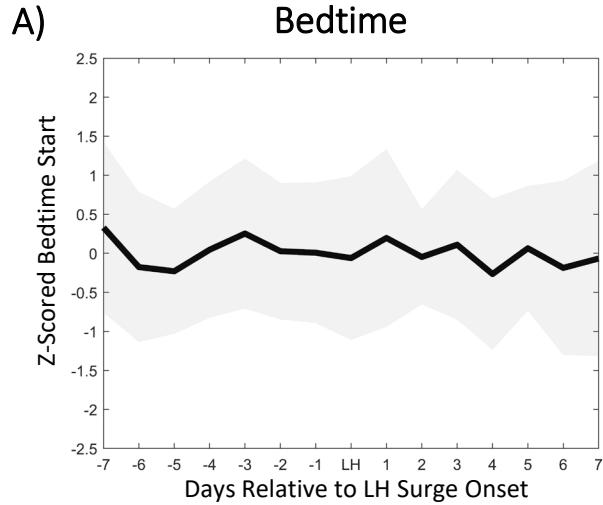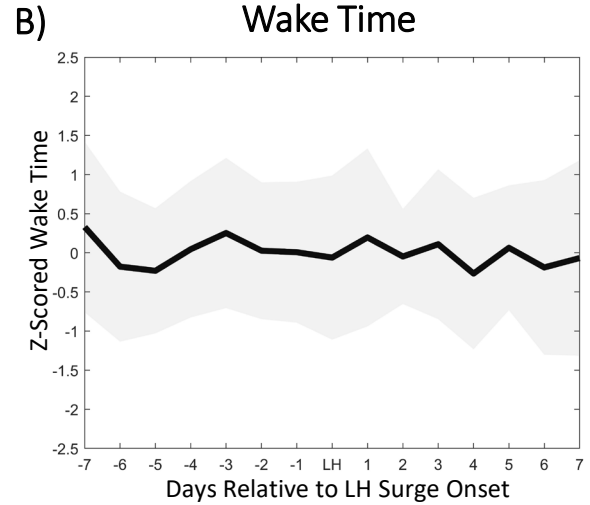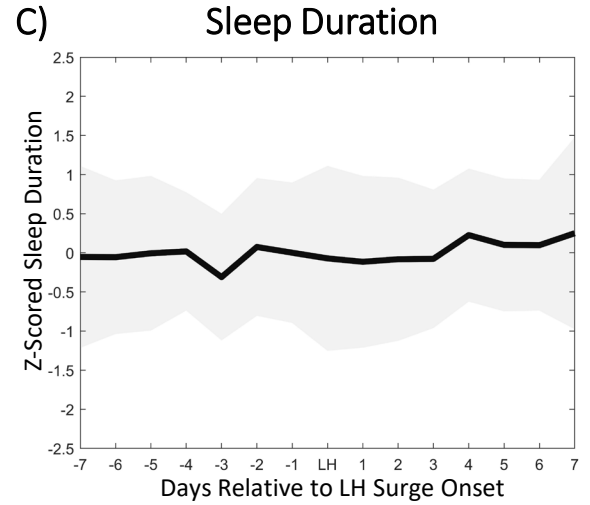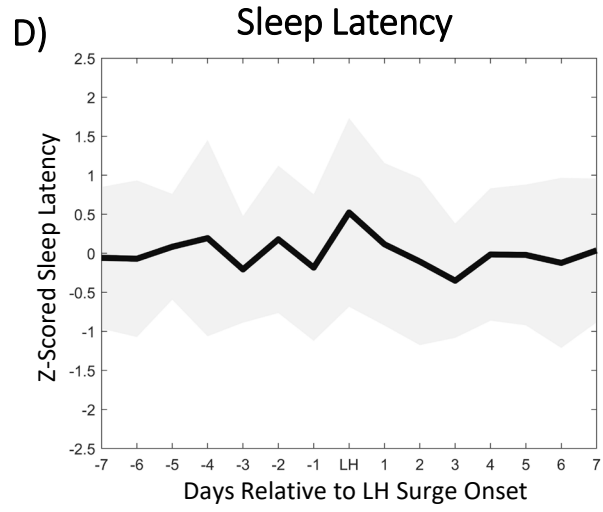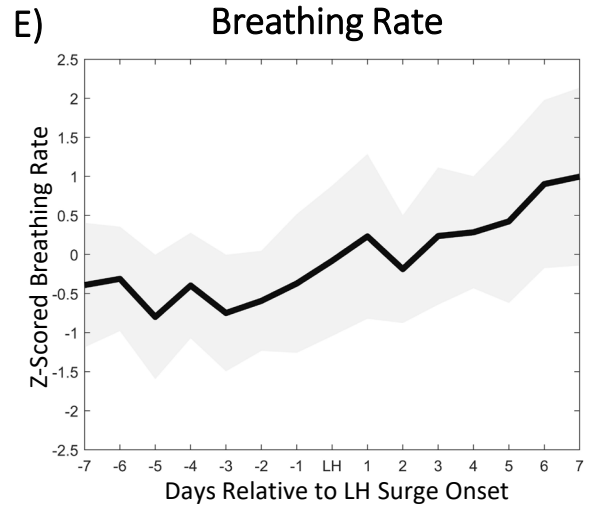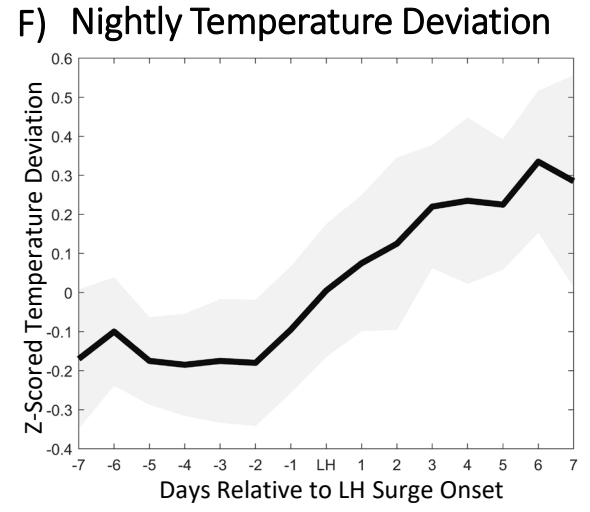

Supp. 2

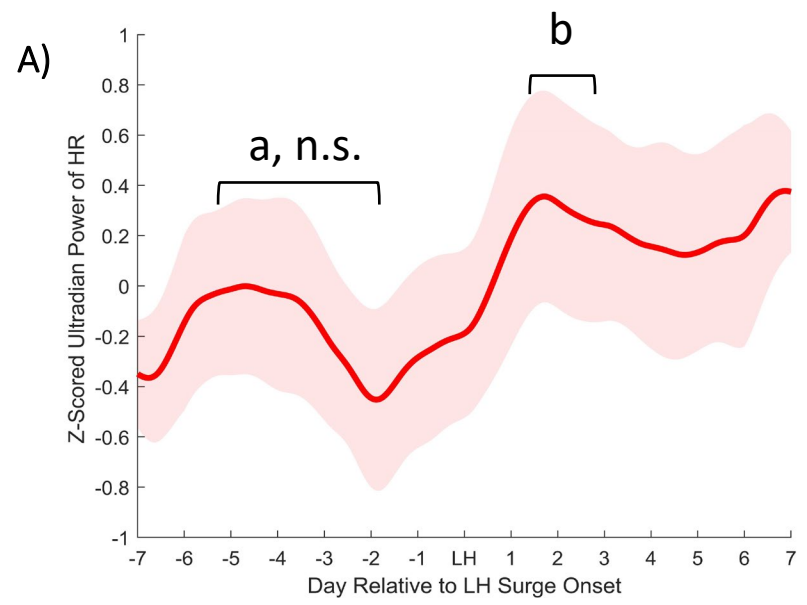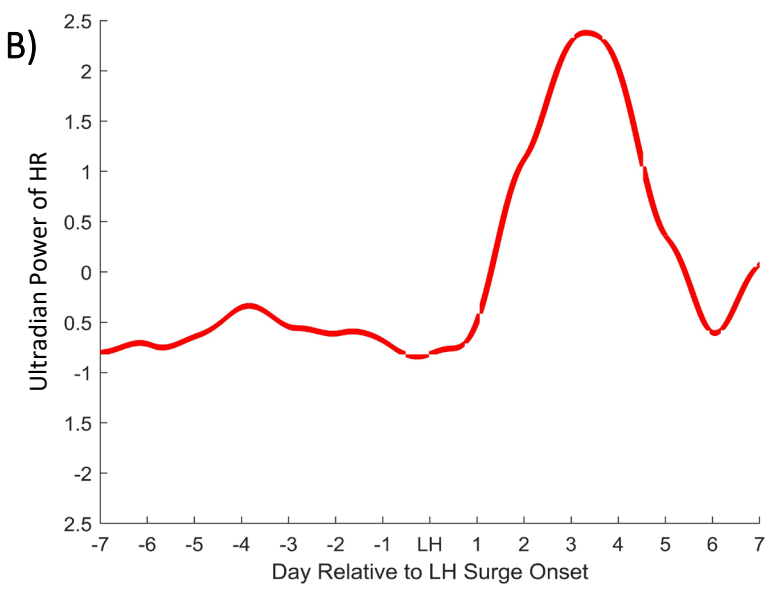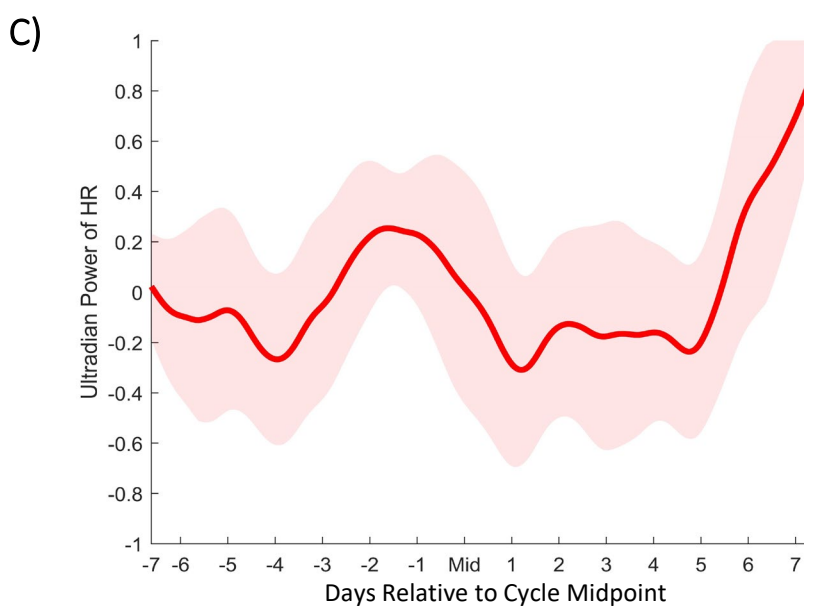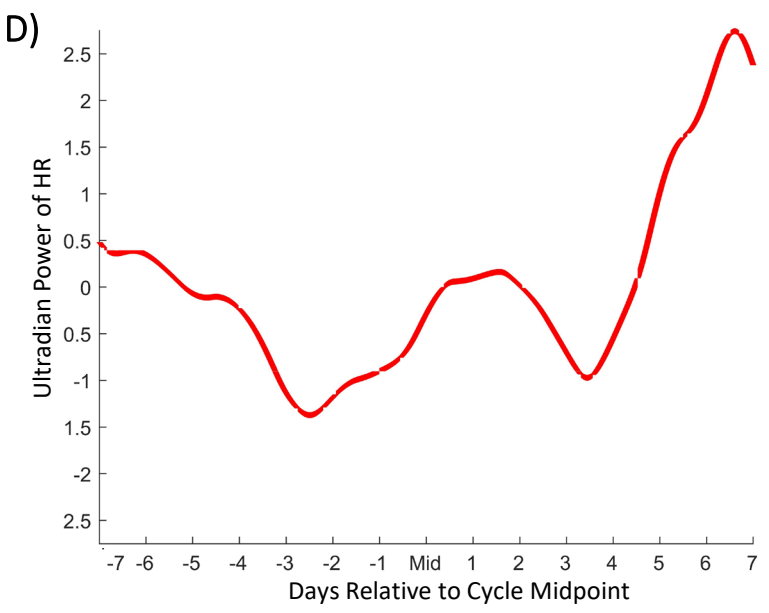

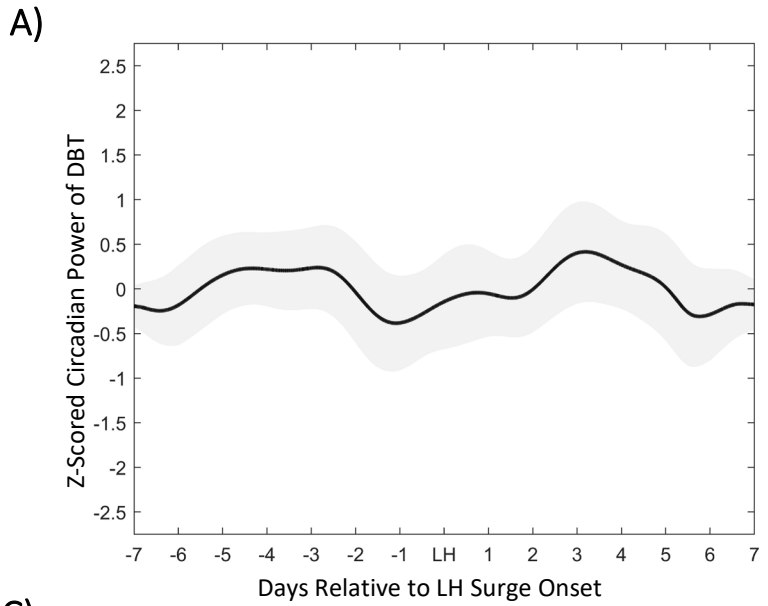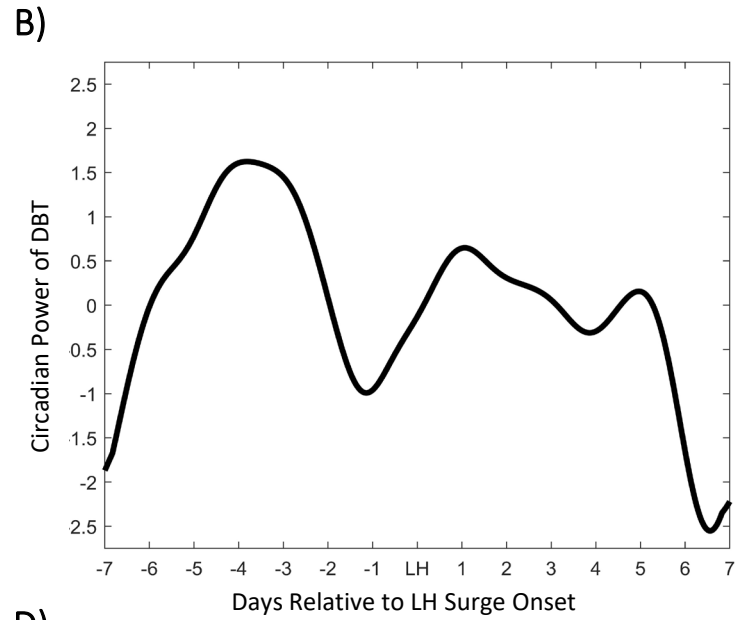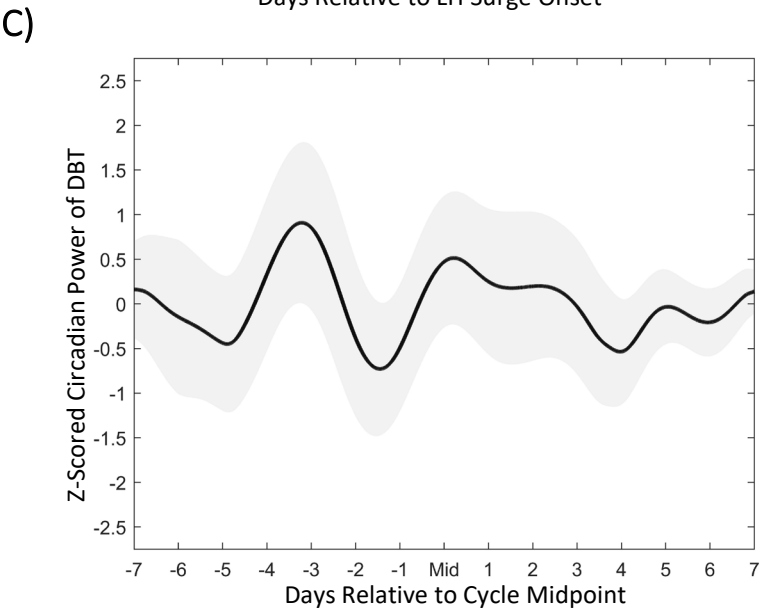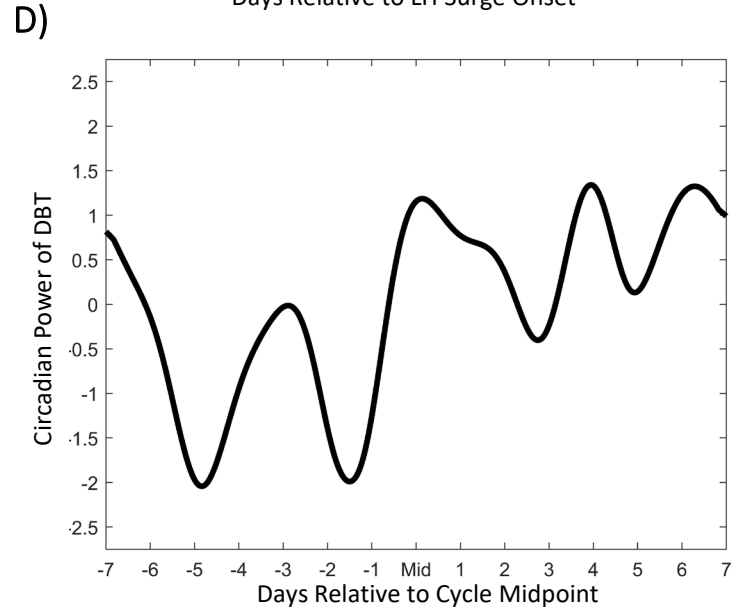

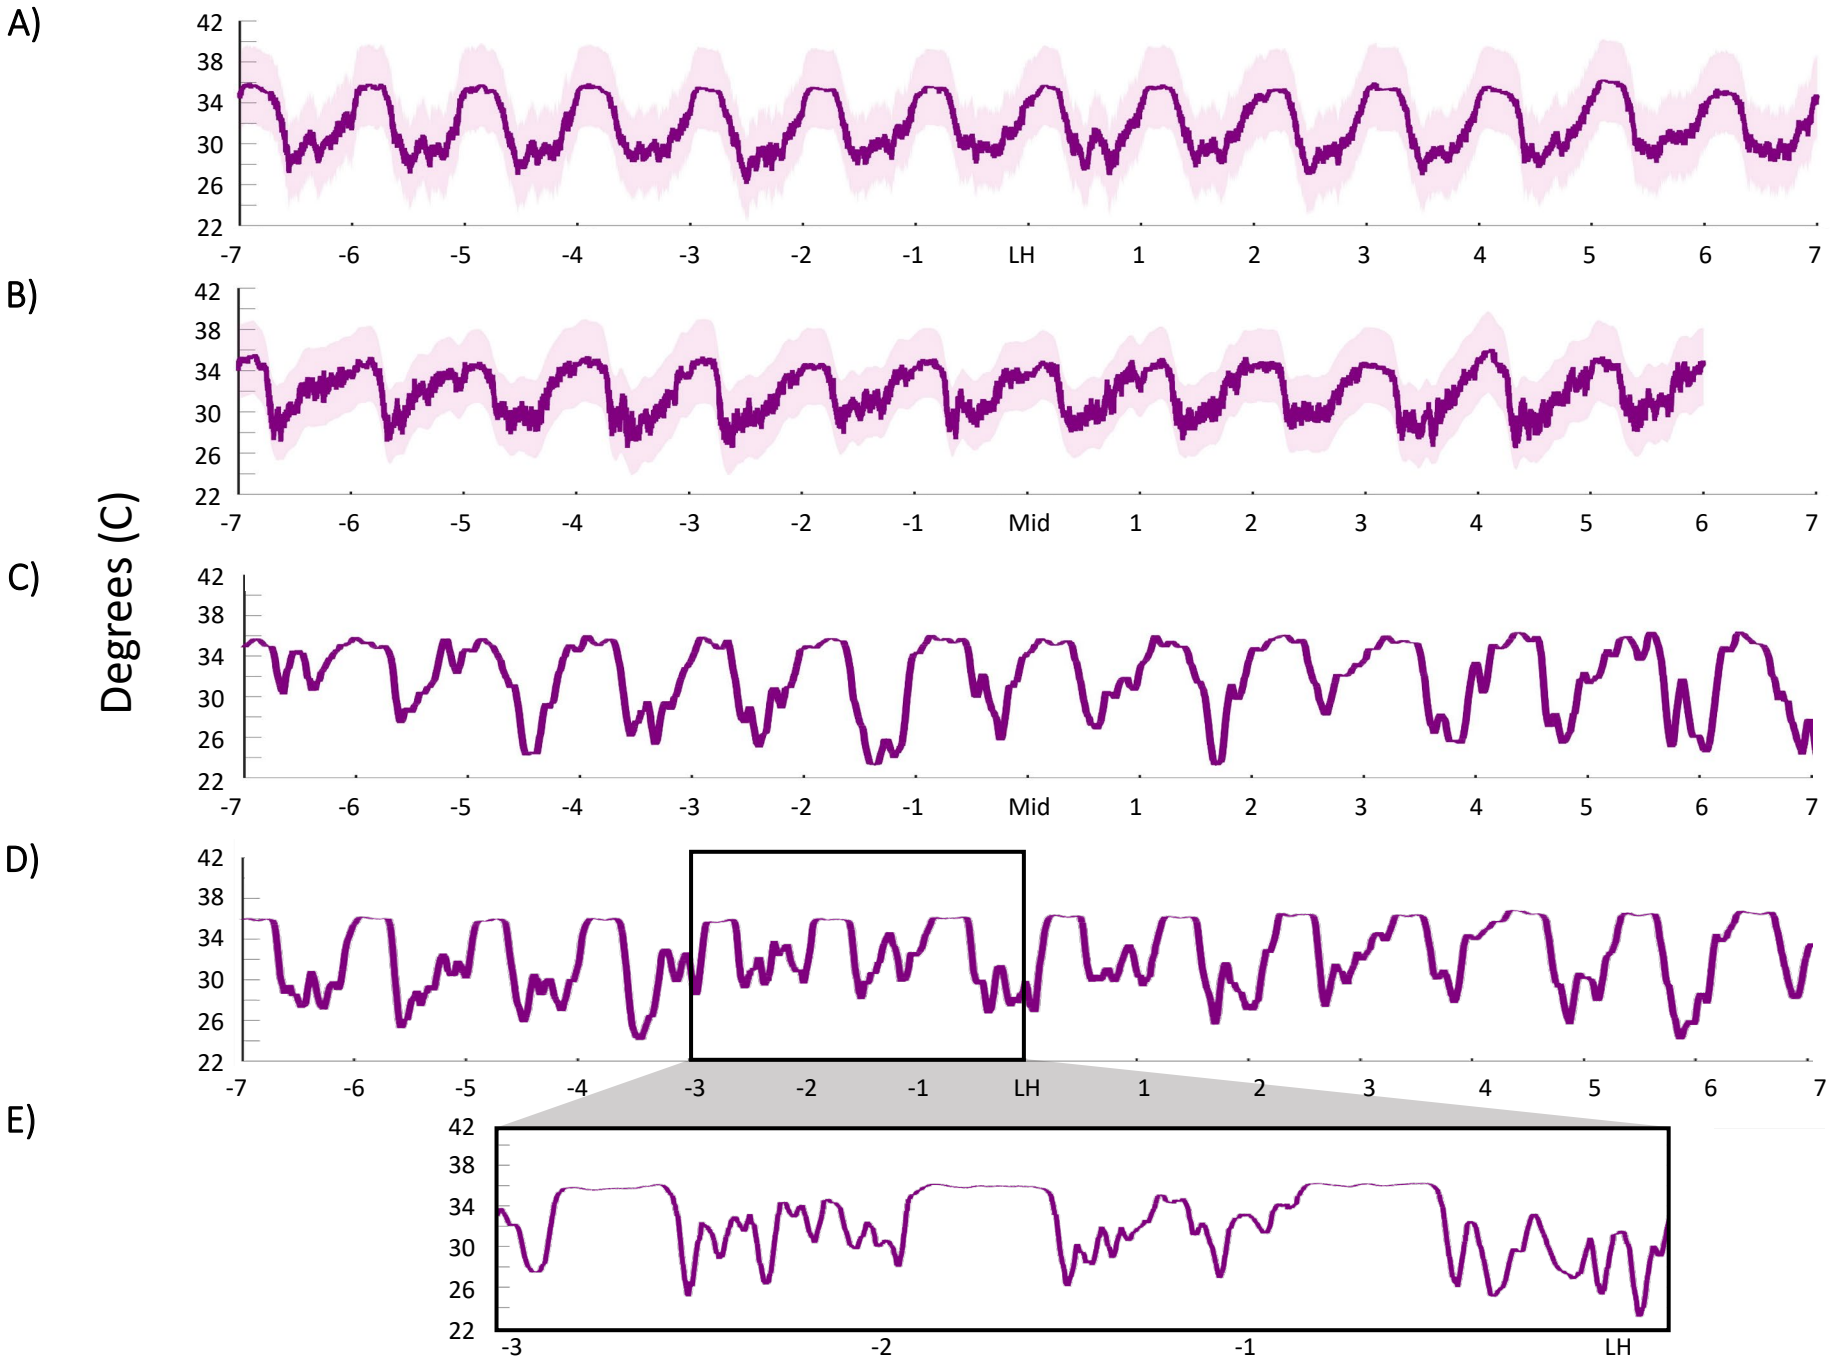

Days Relative to LH Surge or Cycle Midpoint

Supp. 5

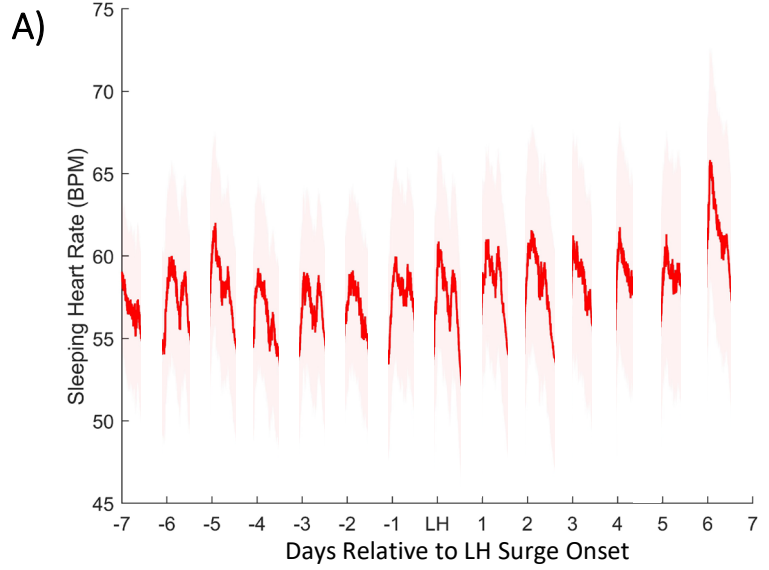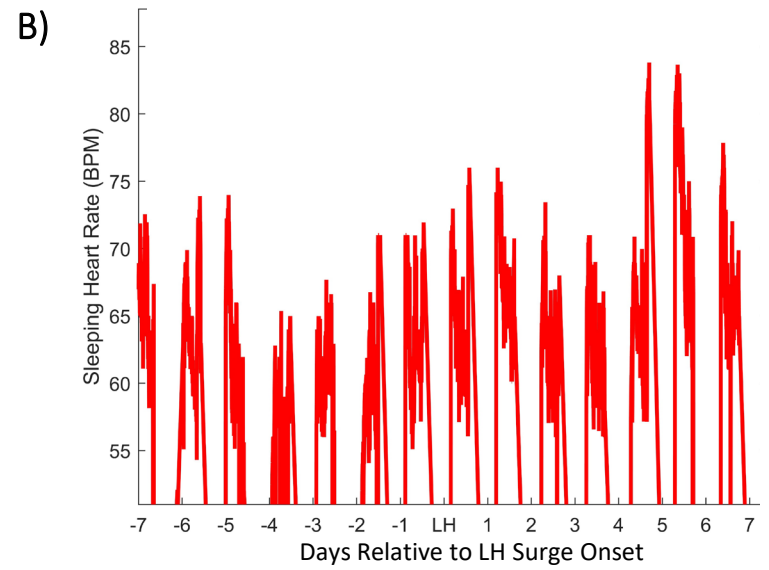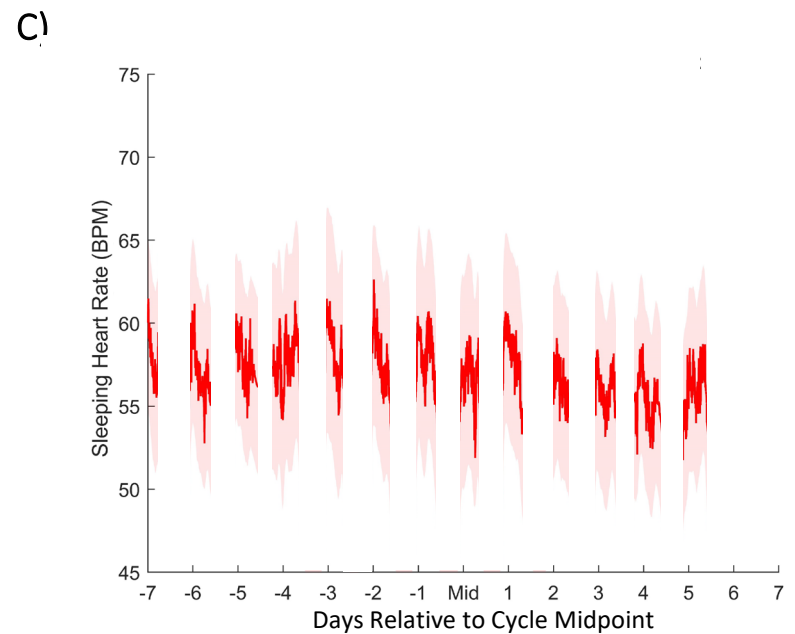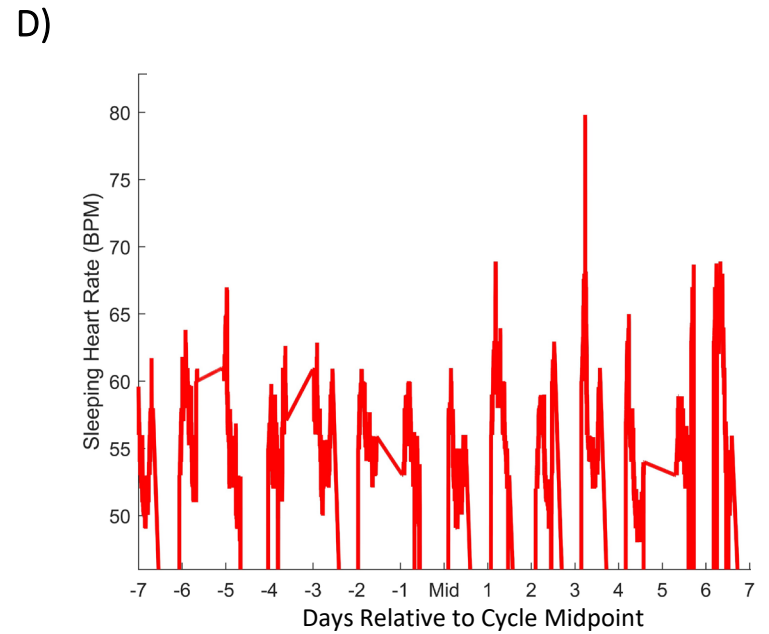

Supp. 6

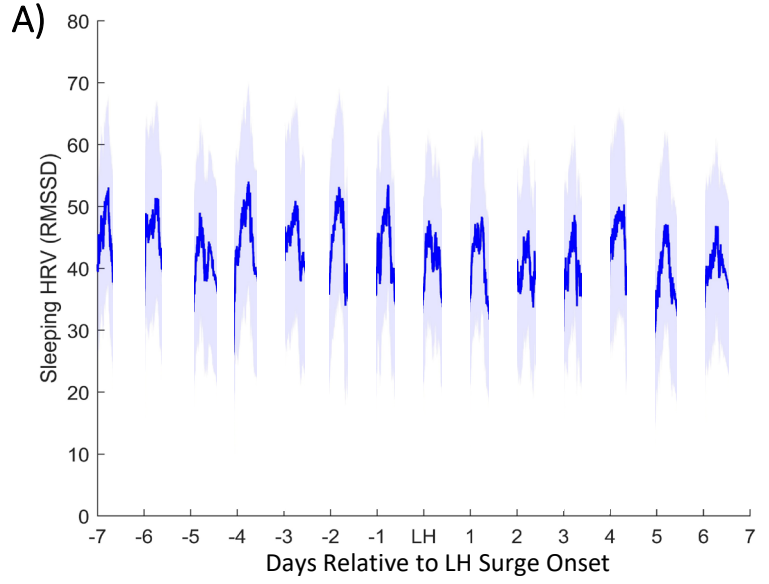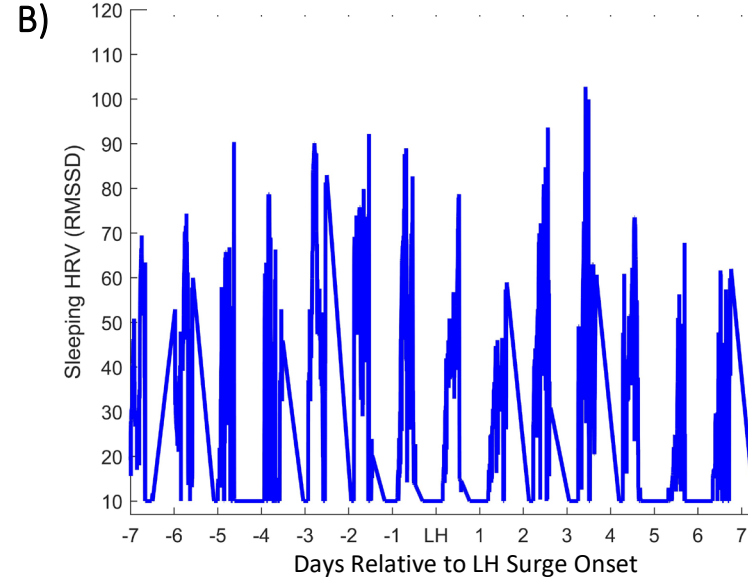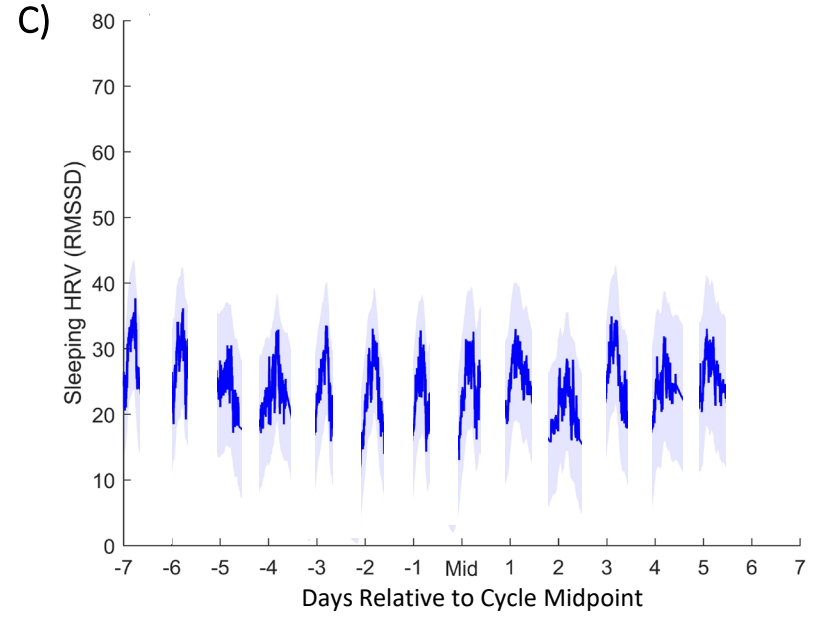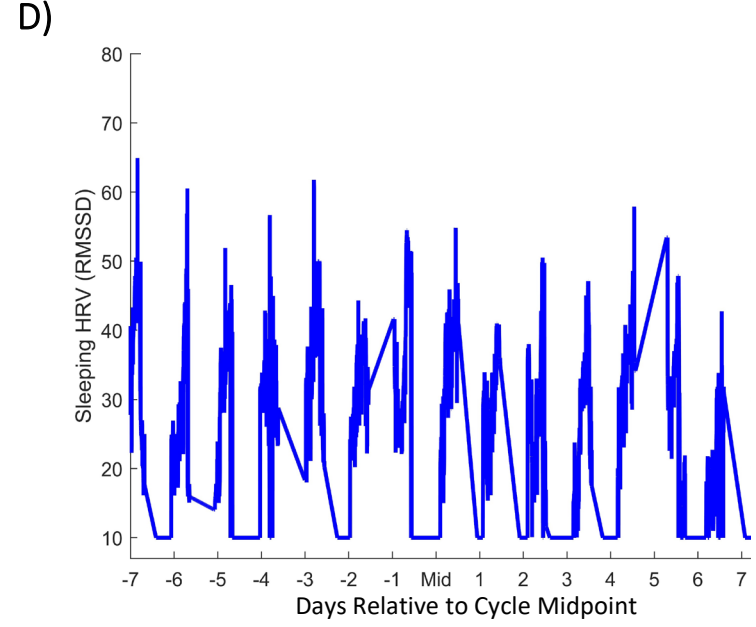

Supplement: 41598_2020_76236_MOESM2_ESM.pdf [file 41598_2020_76236_MOESM2_ESM.pdf]
